# Supplementary material for: The Complete Chloroplast Genome Sequences of Aconitum pseudolaeve and Aconitum longecassidatum, and Development of Molecular Markers for Distinguishing Species in the Aconitum Subgenus Lycoctonum
Source: PubMed Central journal article supplement (PMC6150344; doi:10.3390/molecules22112012), 2017-11-21
Supplement: molecules-22-02012-s001.pdf [file molecules-22-02012-s001.pdf]

Supplementary Materials:

## The Complete Chloroplast Genome Sequences of *Aconitum pseudolaeve* and *Aconitum longecassidatum* and development of molecular markers for distinguish species in *Aconitum* Subgenus *Lycoctonum*

Inkyu Park, Sungyu Yang, Goya Choi, Wook Jin Kim, and Byeong Cheol Moon\*

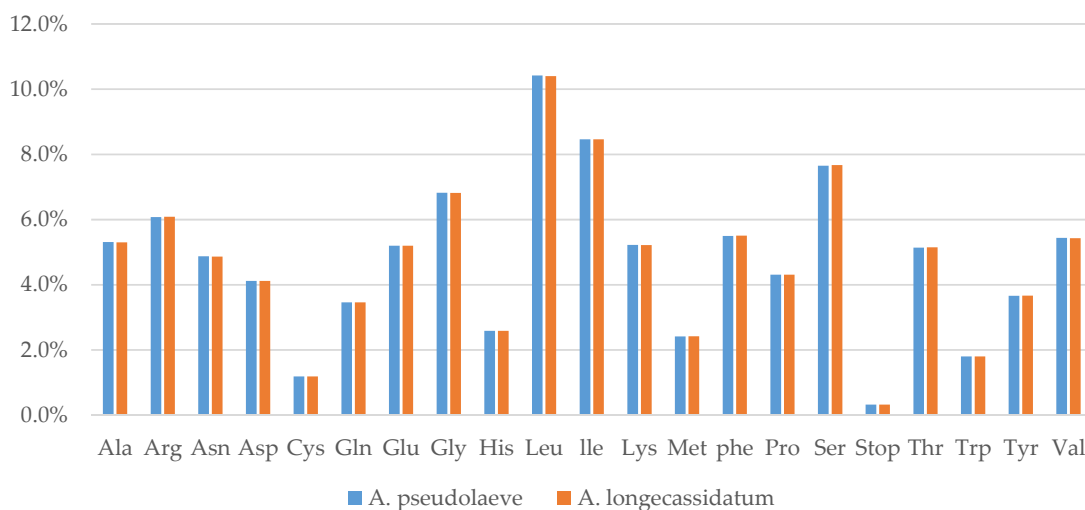

**Figure S1** Amino acid frequencies in *A. pseudolaeve* and *A. longecassidatum* protein-coding sequences

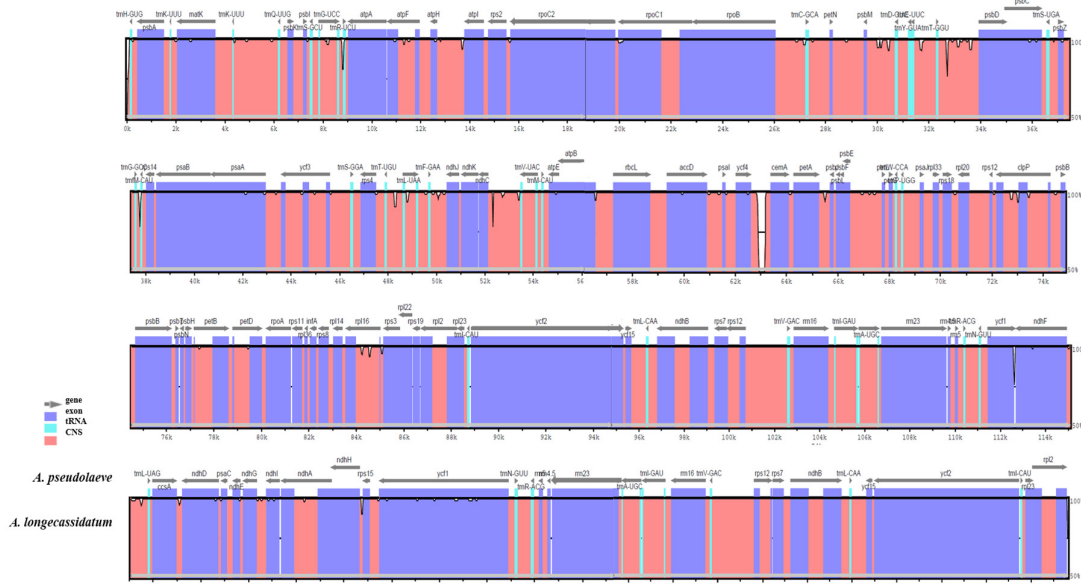

**Figure S2** Comparison of *A. pseudolaeva*, *A. longecassidatum* chloroplast genomes using mVISTA. Complete CP genomes of *A. longecassidatum* were compared with *A. pseudolaeva* as reference. Blue block, conserved gene; Sky-blue block, tRNA and rRNA; Red block, intergenic region. White peaks were sequence variation region between *A. pseudolaeva* and *A. longecassidatum*.

**Table S1** Assembly information of *A. pseudolaeva* and *A. longecassidatum* CP genomes

| Scientific name                 | Aligned reads (#) | Coverage (x) | Genome length (bp) | # of contig |
|---------------------------------|-------------------|--------------|--------------------|-------------|
| <i>Aconitum pseudolaeva</i>     | 405,740           | 345.6        | 155,628            | 7           |
| <i>Aconitum longecassidatum</i> | 264,874           | 222.7        | 155,524            | 6           |

**Table S2** Base composition of two *Aconitum* CP genomes

| <i>A. pseudolaeve</i>     | A (%) | T (%) | G (%) | C (%) | length (bp) |
|---------------------------|-------|-------|-------|-------|-------------|
| LSC                       | 31.4  | 32.5  | 17.7  | 18.4  | 86,683      |
| SSC                       | 34.0  | 33.4  | 15.2  | 17.4  | 17,091      |
| IR                        | 28.4  | 28.4  | 21.6  | 21.6  | 51,854      |
| total                     | 30.7  | 31.2  | 18.7  | 19.3  | 155,628     |
| CDS                       | 30.5  | 31.2  | 20.4  | 17.9  | 79,377      |
| First position            | 30.6  | 23.6  | 26.9  | 18.9  | 26,459      |
| Second position           | 29.4  | 32.2  | 17.9  | 20.5  | 26,459      |
| Third position            | 31.6  | 37.7  | 16.5  | 14.2  | 26,459      |
| <i>A. longecassidatum</i> |       |       |       |       |             |
| LSC                       | 31.4  | 32.5  | 17.7  | 18.4  | 86,466      |
| SSC                       | 34.0  | 33.3  | 15.2  | 17.5  | 16,950      |
| IR                        | 28.5  | 28.5  | 21.5  | 21.5  | 52,108      |
| total                     | 30.7  | 31.2  | 18.7  | 19.3  | 155,524     |
| CDS                       | 30.5  | 31.2  | 20.4  | 17.9  | 79,461      |
| First position            | 30.6  | 23.6  | 26.9  | 18.9  | 26,487      |
| Second position           | 29.4  | 32.2  | 17.9  | 20.5  | 26,487      |
| Third position            | 31.6  | 37.7  | 16.5  | 14.2  | 26,487      |

**Table S3** Codon-anticodon recognition pattern and codon usage for two *Aconitum* genomes

| Amino acid | Codon | <i>A. pseudolaeve</i> |       | <i>A. longecassidatum</i> |      | tRNA                    |
|------------|-------|-----------------------|-------|---------------------------|------|-------------------------|
|            |       | Count                 | RSCU* | Count                     | RSCU |                         |
| Phe        | UUU   | 921                   | 1.27  | 926                       | 1.27 |                         |
| Phe        | UUC   | 534                   | 0.73  | 534                       | 0.73 | trnF-GAA                |
| Leu        | UUA   | 828                   | 1.8   | 830                       | 1.81 | trnL-UAA                |
| Leu        | UUG   | 586                   | 1.28  | 586                       | 1.28 | trnL-CAA                |
| Leu        | CUU   | 563                   | 1.23  | 564                       | 1.23 |                         |
| Leu        | CUC   | 203                   | 0.44  | 203                       | 0.44 |                         |
| Leu        | CUA   | 383                   | 0.83  | 378                       | 0.82 | trnL-UAG                |
| Leu        | CUG   | 194                   | 0.42  | 193                       | 0.42 |                         |
| Ile        | AUU   | 1083                  | 1.45  | 1082                      | 1.45 |                         |
| Ile        | AUC   | 456                   | 0.61  | 457                       | 0.61 | trnI-GAU<br>trnI-CAU    |
| Ile        | AUA   | 701                   | 0.94  | 702                       | 0.94 | trn(f)M-CAU<br>trnM-CAU |
| Met        | AUG   | 640                   | 1     | 641                       | 1    | trnM-CAU                |
| Val        | GUU   | 526                   | 1.46  | 526                       | 1.46 |                         |
| Val        | GUC   | 162                   | 0.45  | 163                       | 0.45 | trnV-GAC                |
| Val        | GUA   | 546                   | 1.52  | 543                       | 1.51 | trnV-UAC                |
| Val        | GUG   | 205                   | 0.57  | 207                       | 0.58 |                         |
| Ser        | UCU   | 561                   | 1.66  | 560                       | 1.65 |                         |
| Ser        | UCC   | 347                   | 1.03  | 348                       | 1.03 | trnS-GGA                |
| Ser        | UCA   | 413                   | 1.22  | 414                       | 1.22 | trnS-UGA                |
| Ser        | UCG   | 198                   | 0.59  | 200                       | 0.59 |                         |
| Pro        | CCU   | 432                   | 1.52  | 431                       | 1.51 |                         |
| Pro        | CCC   | 221                   | 0.78  | 221                       | 0.77 | trnS-GCU                |
| Pro        | CCA   | 338                   | 1.19  | 340                       | 1.19 |                         |
| Pro        | CCG   | 149                   | 0.52  | 149                       | 0.52 |                         |
| Thr        | ACU   | 538                   | 1.58  | 539                       | 1.58 | trnP-UGG                |
| Thr        | ACC   | 252                   | 0.74  | 253                       | 0.74 |                         |
| Thr        | ACA   | 418                   | 1.23  | 420                       | 1.23 |                         |
| Thr        | ACG   | 152                   | 0.45  | 152                       | 0.45 | trnT-GGU                |
| Ala        | GCU   | 599                   | 1.71  | 601                       | 1.71 | trnT-UGU                |
| Ala        | GCC   | 232                   | 0.66  | 231                       | 0.66 |                         |
| Ala        | GCA   | 400                   | 1.14  | 400                       | 1.14 |                         |
| Ala        | GCG   | 174                   | 0.5   | 173                       | 0.49 |                         |
| Tyr        | UAU   | 768                   | 1.59  | 771                       | 1.59 | trnA-UGC                |
| Tyr        | UAC   | 201                   | 0.41  | 201                       | 0.41 |                         |
| Stop       | UAA   | 38                    | 1.33  | 39                        | 1.36 |                         |
| Stop       | UAG   | 25                    | 0.87  | 25                        | 0.87 | trnY-GUA                |

|      |     |      |      |      |      |          |
|------|-----|------|------|------|------|----------|
| His  | CAU | 517  | 1.51 | 517  | 1.51 |          |
| His  | CAC | 168  | 0.49 | 168  | 0.49 |          |
| Gln  | CAA | 689  | 1.51 | 691  | 1.51 |          |
| Gln  | CAG | 226  | 0.49 | 226  | 0.49 |          |
| Asn  | AAU | 989  | 1.53 | 989  | 1.54 | trnH-GUG |
| Asn  | AAC | 300  | 0.47 | 299  | 0.46 | trnQ-UUG |
| Lys  | AAA | 1004 | 1.45 | 1005 | 1.45 |          |
| Lys  | AAG | 378  | 0.55 | 378  | 0.55 |          |
| Asp  | GAU | 876  | 1.61 | 877  | 1.61 | trnN-GUU |
| Asp  | GAC | 214  | 0.39 | 215  | 0.39 | trnK-UUU |
| Glu  | GAA | 1006 | 1.46 | 1008 | 1.46 |          |
| Glu  | GAG | 370  | 0.54 | 369  | 0.54 |          |
| Cys  | UGU | 236  | 1.5  | 236  | 1.5  | trnD-GUC |
| Cys  | UGC | 79   | 0.5  | 79   | 0.5  | trnE-UUC |
| Stop | UGA | 23   | 0.8  | 22   | 0.77 |          |
| Trp  | UGG | 477  | 1    | 477  | 1    |          |
| Arg  | CGU | 364  | 1.36 | 364  | 1.35 | trnC-GCA |
| Arg  | CGC | 89   | 0.33 | 89   | 0.33 | trnW-CCA |
| Arg  | CGA | 356  | 1.33 | 358  | 1.33 | trnR-ACG |
| Arg  | CGG | 120  | 0.45 | 120  | 0.45 |          |
| Ser  | AGU | 391  | 1.16 | 395  | 1.17 |          |
| Ser  | AGC | 115  | 0.34 | 115  | 0.34 |          |
| Arg  | AGA | 500  | 1.87 | 502  | 1.87 | trnR-UCU |
| Arg  | AGG | 179  | 0.67 | 179  | 0.67 |          |
| Gly  | GGU | 609  | 1.35 | 609  | 1.35 |          |
| Gly  | GGC | 181  | 0.4  | 180  | 0.4  | trnG-GCC |
| Gly  | GGA | 721  | 1.6  | 722  | 1.6  | trnG-UCC |
| Gly  | GGG | 295  | 0.65 | 295  | 0.65 |          |

---

\*RSCU – Relative synonymous codon usage

**Table S4** Distribution of tandem repeats in two *Aconitum* CP genomes

| <i>A. pseudolaeve</i>            |                                   | Repeat | Repeat                      | Repeat  | Region |
|----------------------------------|-----------------------------------|--------|-----------------------------|---------|--------|
|                                  | Position                          | unit   | unit sequence               | numbers |        |
|                                  |                                   | length |                             |         |        |
|                                  |                                   | (bp)   |                             |         |        |
| 1                                | IGS ( <i>rpl2, trnH-GUG</i> )     | 17     | AATAAATAGAAATAATA           | 2       | LSC    |
| 2                                | IGS ( <i>rpl2, trnH-GUG</i> )     | 13     | AAATAATAAATAG               | 2       | LSC    |
| 3                                | IGS ( <i>trnK-UUUU, rps16</i> )   | 17     | ACTAATAGTATATATAG           | 3       | LSC    |
| 4                                | IGS ( <i>trnK-UUUU, rps16</i> )   | 15     | TAATAGTATATATAG             | 3       | LSC    |
| 5                                | IGS ( <i>trnS-GCU, trnG-GCC</i> ) | 19     | TACACATGAAGTCAAGAAA         | 2       | LSC    |
| 6                                | IGS ( <i>trnG-GCC, trnR-UCU</i> ) | 18     | ATAGGAAAGGCAAAAAAT          | 2       | LSC    |
| 7                                | IGS ( <i>atpF, atpH</i> )         | 20     | GTTATTGTAGGAGTGAAATC        | 2       | LSC    |
| 8                                | IGS ( <i>rpoB, trnC-GCA</i> )     | 21     | TGGATCGATCTAGTAATGATG       | 2       | LSC    |
| 9                                | IGS ( <i>psbM, trnD-GUC</i> )     | 2      | ATATATATATATATATATATATATAT  | 14      | LSC    |
| 10                               | IGS ( <i>trnE-UUC, trnT-GGU</i> ) | 22     | ATATAGTATAGAAAATAATAAA      | 2       | LSC    |
| 11                               | IGS ( <i>trnT-GGU, psbD</i> )     | 15     | ATAGTCATTATAATG             | 2       | LSC    |
| 12                               | IGS ( <i>trnT-UGU, trnL-UAA</i> ) | 16     | TAAATAAATAATATA             | 2       | LSC    |
| 13                               | IGS ( <i>ndhC, trnV-UAC</i> )     | 21     | CTATTTATTATTCTATTATA        | 2       | LSC    |
| 14                               | IGS ( <i>accD, psal</i> )         | 21     | TTATAGTAATAAGTAATCAAA       | 2       | LSC    |
| 15                               | IGS ( <i>rpl36, rpl36</i> )       | 24     | ACGTCCATTCTTACGTGAGCCAAT    | 2       | LSC    |
| 16                               | CDS ( <i>ycf2</i> )               | 15     | TATTGATGATATCAA             | 3       | IR     |
| 17                               | CDS ( <i>ycf2</i> )               | 18     | ATATTGATGATAGTGACG          | 3       | IR     |
| 18                               | CDS ( <i>ycf2</i> )               | 21     | AGATAATGAACTATTCAAGA        | 2       | IR     |
| 19                               | CDS ( <i>ndhG</i> )               | 15     | TATTACCTATTATAT             | 2       | SSC    |
| 20                               | CDS ( <i>ndhI</i> )               | 27     | GCTACTTTAAATCAAACTAAAATCTTA | 2       | SSC    |
| 21                               | CDS ( <i>ycf1</i> )               | 21     | ATCTATATCTGCTGGTAAATA       | 2       | SSC    |
| <b><i>A. longecassidatum</i></b> |                                   |        |                             |         |        |
| 1                                | IGS ( <i>trnK-UUUU, rps16</i> )   | 17     | ACTAATAGTATATATAG           | 3       | LSC    |
| 2                                | IGS ( <i>trnK-UUUU, rps16</i> )   | 15     | TAATAGTATATATAG             | 3       | LSC    |
| 3                                | IGS ( <i>trnS-GCU, trnG-GCC</i> ) | 19     | TACACATGAAGTCAAGAAA         | 2       | LSC    |
| 4                                | IGS ( <i>atpF, atpH</i> )         | 20     | GTTATTGTAGGAGTGAAATC        | 2       | LSC    |
| 5                                | IGS ( <i>rpoB, trnC-GCA</i> )     | 21     | TGGATCGATCTAGTAATGATG       | 2       | LSC    |
| 6                                | IGS ( <i>trnE-UUC, trnT-GGU</i> ) | 22     | AGTATAGAAAATAATAAAATAG      | 2       | LSC    |
| 7                                | IGS ( <i>trnT-GGU, psbD</i> )     | 15     | ATAGTCATTATAATG             | 2       | LSC    |
| 8                                | IGS ( <i>trnT-GGU, psbD</i> )     | 22     | AAATATTCCTACTTATTAATGT      | 2       | LSC    |
| 9                                | IGS ( <i>trnG-UCC, trnM-CAU</i> ) | 21     | TTAACAGAGTCAGACCTAAAA       | 2       | LSC    |
| 10                               | IGS ( <i>trnT-UGU, trnL-UAA</i> ) | 16     | TAAATAAATAATATA             | 2       | LSC    |
| 11                               | IGS ( <i>ndhC, trnV-UAC</i> )     | 21     | CTATTTATTATTCTATTATA        | 5       | LSC    |
| 12                               | IGS ( <i>accD, psal</i> )         | 21     | TTATAGTAATAAGTAATCAAA       | 2       | LSC    |
| 13                               | IGS ( <i>rps11, rps11</i> )       | 24     | ACGTCCATTCTTACGTGAGCCAAT    | 2       | LSC    |
| 14                               | CDS ( <i>ycf2</i> )               | 15     | TATTGATGATATCAA             | 3       | IR     |

|    |                          |    |                             |   |     |
|----|--------------------------|----|-----------------------------|---|-----|
| 15 | CDS ( <i>ycf2</i> )      | 18 | ATATTGATGATAGTGACG          | 3 | IR  |
| 16 | CDS ( <i>ycf2</i> )      | 21 | AGATAATGAACTATTCAAAGA       | 2 | IR  |
| 17 | IGS ( <i>ndhE,ndhG</i> ) | 15 | TATTACCTATTATAT             | 2 | SSC |
| 18 | IGS ( <i>ndhG,ndhI</i> ) | 27 | GCTACTTTAAATCAAAACTAAATCTTA | 2 | SSC |
| 19 | CDS ( <i>ycf1</i> )      | 21 | ATCTATATCTGCTGGTAAATA       | 2 | SSC |

---

**Table S5** Indel mutation events between the *A. pseudolaeve* and *A. longecassidatum* CP genomes

| No | Location                                   | region | motif                                                          | Size | Direction * |
|----|--------------------------------------------|--------|----------------------------------------------------------------|------|-------------|
| 1  | - <i>trnH-GUG</i> (IGS)                    | LSC    | AAATAATAAATAGAAAT                                              | 17   | Deletion    |
| 2  | <i>trnH-GUG</i> - <i>psbA</i> (IGS)        | LSC    | A                                                              | 1    | Deletion    |
| 3  | <i>trnK-UUUU</i> - <i>matK</i> (IGS)       | LSC    | T                                                              | 1    | Deletion    |
| 4  | <i>trnK-UUUU</i> - <i>trnQ-UUG</i> (IGS)   | LSC    | AA                                                             | 2    | Deletion    |
| 5  | <i>trnK-UUUU</i> - <i>trnQ-UUG</i> (IGS)   | LSC    | T                                                              | 2    | Insertion   |
| 6  | <i>trnG-UCC</i> - <i>trnG-UCC</i> (intron) | LSC    | T                                                              | 2    | Insertion   |
| 7  | <i>trnG-UCC</i> - <i>trnG-UCC</i> (intron) | LSC    | TTT                                                            | 3    | Insertion   |
| 8  | <i>trnG-UCC</i> - <i>trnR-UCU</i> (IGS)    | LSC    | ATAGGAAAGGCCAAAAAAT                                            | 18   | Deletion    |
| 9  | <i>atpF</i> - <i>atpF</i> (intron)         | LSC    | TTG                                                            | 3    | Insertion   |
| 10 | <i>atpF</i> - <i>atpF</i> (intron)         | LSC    | A                                                              | 1    | Deletion    |
| 11 | <i>atpH</i> - <i>atpI</i> (IGS)            | LSC    | ATATAT                                                         | 6    | Insertion   |
| 12 | <i>rps2</i> - <i>rpoC2</i> (IGS)           | LSC    | T                                                              | 1    | Insertion   |
| 13 | <i>rpoC1</i> (exon)                        | LSC    | CT                                                             | 2    | Deletion    |
| 14 | <i>rpoB</i> - <i>trnC-GCA</i> (IGS)        | LSC    | AAA                                                            | 3    | Insertion   |
| 15 | <i>psbM</i> - <i>trnD-GUC</i> (IGS)        | LSC    | TTTTT                                                          | 5    | Insertion   |
| 16 | <i>psbM</i> - <i>trnD-GUC</i> (IGS)        | LSC    | TTTTA                                                          | 5    | Deletion    |
| 17 | <i>psbM</i> - <i>trnD-GUC</i> (IGS)        | LSC    | ATATAT                                                         | 6    | Deletion    |
| 18 | <i>trnE-UUC</i> - <i>trnT-GGU</i> (IGS)    | LSC    | GATATA                                                         | 6    | Deletion    |
| 19 | <i>trnT-GGU</i> - <i>psbD</i> (IGS)        | LSC    | TTAAATGTAAATATCCTACTTC                                         | 22   | Insertion   |
| 20 | <i>trnT-GGU</i> - <i>psbD</i> (IGS)        | LSC    | TTTT                                                           | 4    | Deletion    |
| 21 | <i>trnT-GGU</i> - <i>psbD</i> (IGS)        | LSC    | A                                                              | 1    | Deletion    |
| 22 | <i>trnT-GGU</i> - <i>psbD</i> (IGS)        | LSC    | TTAGTT                                                         | 6    | Deletion    |
| 23 | <i>trnS-UGA</i> - <i>psbZ</i> (IGS)        | LSC    | A                                                              | 1    | Deletion    |
| 24 | <i>trnJ-M-CAU</i> - <i>rps14</i> (IGS)     | LSC    | AAAATTAACAGAGTCAGACCTA                                         | 22   | Insertion   |
| 25 | <i>psaA</i> - <i>ycf3</i> (IGS)            | LSC    | T                                                              | 1    | Insertion   |
| 26 | <i>ycf3</i> (exon)                         | LSC    | T                                                              | 1    | Insertion   |
| 27 | <i>ycf3</i> - <i>ycf3</i> (intron)         | LSC    | A                                                              | 1    | Deletion    |
| 28 | <i>ycf3</i> - <i>trnS-GGA</i> (IGS)        | LSC    | C                                                              | 1    | Insertion   |
| 29 | <i>rps4</i> - <i>trnT-UGU</i> (IGS)        | LSC    | A                                                              | 1    | Deletion    |
| 30 | <i>trnT-UGU</i> - <i>trnL-UAA</i> (IGS)    | LSC    | AAAAGGGTG                                                      | 9    | Deletion    |
| 31 | <i>trnL-UAA</i> - <i>trnL-UAA</i> (intron) | LSC    | TACAAA                                                         | 6    | Deletion    |
| 32 | <i>trnF-GAA</i> - <i>ndhJ</i> (IGS)        | LSC    | TT                                                             | 2    | Insertion   |
| 33 | <i>ndhC</i> - <i>trnV-UAC</i> (IGS)        | LSC    | TATTATTCTATTATACTATTATTATTCTAT<br>TATACTATTATTATTCTATTATACTATT | 63   | Insertion   |
| 34 | <i>ndhC</i> - <i>trnV-UAC</i> (IGS)        | LSC    | A                                                              | 1    | Insertion   |
| 35 | <i>ndhC</i> - <i>trnV-UAC</i> (IGS)        | LSC    | AA                                                             | 2    | Insertion   |
| 36 | <i>trnV-UAC</i> - <i>trnV-UAC</i> (intron) | LSC    | AAAAA                                                          | 5    | Deletion    |
| 37 | <i>atpB</i> - <i>rbcL</i> (IGS)            | LSC    | TAAAG                                                          | 2    | Deletion    |



|    |                              |     |                                    |     |           |
|----|------------------------------|-----|------------------------------------|-----|-----------|
| 38 | <i>accD - psal</i> (IGS)     | LSC | A                                  | 1   | Deletion  |
| 39 | <i>accD - psal</i> (IGS)     | LSC | A                                  | 1   | Deletion  |
| 40 | <i>psal - ycf4</i> (IGS)     | LSC | T                                  | 1   | Insertion |
| 41 | <i>ycf4 - cemA</i> (IGS)     | LSC | TAAAG                              | 1   | Deletion  |
|    |                              |     | ATCTTGAATTA AAAATTTTTTTTTTTTATGTT  |     |           |
|    |                              |     | TTGTTTATTTTTATCCTTTCCTTTTCCTTTTGAT |     |           |
|    |                              |     | GATCAAAAAGATTGGATCGTTTATAACTATAA   |     |           |
|    |                              |     | TCATTCTATTATCTCTTTTTTGTACTCGTT     |     |           |
| 42 | <i>ycf4 - cemA</i> (IGS)     | LSC | TTTGATTTTCATCTTATCAATACAAGATTTTCC  | 256 | Deletion  |
|    |                              |     | TAAATTTCCCTCAACTATTCCCGGCTACGG     |     |           |
|    |                              |     | CTAGCCAGCGAAGTTTTTCGAAATAATTGAT    |     |           |
|    |                              |     | CTAAGGGGGTTCCTTTTGCCCCGAAATCAAAA   |     |           |
| 43 | <i>petA - psbJ</i> (IGS)     | LSC | TTT                                | 3   | Deletion  |
| 44 | <i>petA - psbJ</i> (IGS)     | LSC | TTT                                | 3   | Deletion  |
| 45 | <i>psbE - petL</i> (IGS)     | LSC | A                                  | 1   | Deletion  |
| 46 | <i>psbE - petL</i> (IGS)     | LSC | T                                  | 1   | Deletion  |
| 47 | <i>clpP - clpP</i> (intron)  | LSC | AAAT                               | 4   | Insertion |
| 48 | <i>clpP</i> (exon)           | LSC | TATTCCG                            | 6   | Insertion |
| 49 | <i>clpP - clpP</i> (intron)  | LSC | AAA                                | 3   | Deletion  |
| 50 | <i>clpP - clpP</i> (intron)  | LSC | AAA                                | 3   | Insertion |
| 51 | <i>clpP - clpP</i> (intron)  | LSC | AAATCA                             | 6   | Insertion |
| 52 | <i>rps3</i> (exon)           | LSC | TTT                                | 3   | Insertion |
|    |                              |     | TAAGAAATGAAATGTCACAATATTTTTTTAT    |     |           |
|    |                              |     | ACATGTCGAAGTGATGGAAAACAAAAATC      |     |           |
| 53 | <i>ycf1 - ndhF</i> (IGS)     | SSC | TCITTTACATATCCACCAAGTTTGCAACTTT    | 111 | Insertion |
|    |                              |     | TTTTGAAATGATACAAC                  |     |           |
| 54 | <i>ndhF - trnL-UAG</i> (IGS) | SSC | A                                  | 1   | Deletion  |
| 55 | <i>ndhF - trnL-UAG</i> (IGS) | SSC | A                                  | 1   | Deletion  |
| 56 | <i>ndhF - trnL-UAG</i> (IGS) | SSC | T                                  | 1   | Deletion  |
| 57 | <i>ndhD</i> (exon)           | SSC | TTT                                | 3   | Deletion  |
| 58 | <i>psaC</i> (exon)           | SSC | A                                  | 1   | Insertion |
| 59 | <i>ndhI</i> (exon)           | SSC | T                                  | 1   | Deletion  |
| 60 | <i>ndhA - ndhA</i> (intron)  | SSC | AA                                 | 2   | Deletion  |
| 61 | <i>rps15</i> (exon)          | SSC | ATAATATAAA                         | 10  | Insertion |

**Table S6.** SNP mutation events between *A. pseudolaeve* and *A. longecassidatum* CP genomes

| No. | Location                                     | Region | <i>A. pseudolaeve</i> | <i>A. longecassidatum</i> |
|-----|----------------------------------------------|--------|-----------------------|---------------------------|
| 1   | <i>trnH</i> -GUG (IGS)                       | LSC    | T                     | A                         |
| 2   | <i>trnH</i> -GUG (IGS)                       | LSC    | A                     | T                         |
| 3   | <i>matK</i> (exon)                           | LSC    | C                     | T                         |
| 4   | <i>psbI</i> - <i>trnS</i> -GCU (IGS)         | LSC    | A                     | C                         |
| 5   | <i>trnG</i> -UCC - <i>trnG</i> -UCC (intron) | LSC    | G                     | T                         |
| 6   | <i>trnG</i> -UCC - <i>trnG</i> -UCC (intron) | LSC    | A                     | C                         |
| 7   | <i>atpF</i> (exon)                           | LSC    | T                     | G                         |
| 8   | <i>atpH</i> (exon)                           | LSC    | G                     | A                         |
| 9   | <i>atpH</i> - <i>atpI</i> (IGS)              | LSC    | G                     | A                         |
| 10  | <i>rps2</i> - <i>rpoC2</i> (IGS)             | LSC    | C                     | A                         |
| 11  | <i>rpoC1</i> - <i>rpoC1</i> (intron)         | LSC    | A                     | C                         |
| 12  | <i>rpoB</i> - <i>trnC</i> -GCA (IGS)         | LSC    | C                     | T                         |
| 13  | <i>rpoB</i> - <i>trnC</i> -GCA (IGS)         | LSC    | A                     | G                         |
| 14  | <i>trnC</i> -GCA - <i>petN</i> (IGS)         | LSC    | C                     | T                         |
| 15  | <i>psbM</i> - <i>trnD</i> -GUC (IGS)         | LSC    | A                     | C                         |
| 16  | <i>trnE</i> -UUC - <i>trnT</i> -GGU (IGS)    | LSC    | T                     | G                         |
| 17  | <i>trnT</i> -GGU - <i>psbD</i> (IGS)         | LSC    | T                     | G                         |
| 18  | <i>trnT</i> -GGU - <i>psbD</i> (IGS)         | LSC    | A                     | C                         |
| 19  | <i>trnT</i> -GGU - <i>psbD</i> (IGS)         | LSC    | T                     | C                         |
| 20  | <i>psbC</i> (exon)                           | LSC    | C                     | T                         |
| 21  | <i>psbC</i> (exon)                           | LSC    | T                     | C                         |
| 22  | <i>psbZ</i> (exon)                           | LSC    | G                     | T                         |
| 23  | <i>psaA</i> (exon)                           | LSC    | C                     | A                         |
| 24  | <i>psaA</i> (exon)                           | LSC    | A                     | G                         |
| 25  | <i>trnL</i> -UAA - <i>trnF</i> -GAA (IGS)    | LSC    | C                     | T                         |
| 26  | <i>trnF</i> -GAA - <i>ndhJ</i> (IGS)         | LSC    | C                     | T                         |
| 27  | <i>trnF</i> -GAA - <i>ndhJ</i> (IGS)         | LSC    | T                     | C                         |
| 28  | <i>trnF</i> -GAA - <i>ndhJ</i> (IGS)         | LSC    | C                     | G                         |
| 29  | <i>trnF</i> -GAA - <i>ndhJ</i> (IGS)         | LSC    | T                     | G                         |
| 30  | <i>atpE</i> (exon)                           | LSC    | G                     | A                         |
| 31  | <i>accD</i> (exon)                           | LSC    | C                     | A                         |
| 32  | <i>ycf4</i> (exon)                           | LSC    | T                     | C                         |
| 33  | <i>cemA</i> - <i>petA</i> (IGS)              | LSC    | T                     | G                         |
| 34  | <i>psbE</i> - <i>petL</i> (IGS)              | LSC    | T                     | G                         |
| 35  | <i>rps18</i> - <i>rpl20</i> (IGS)            | LSC    | A                     | C                         |
| 36  | <i>rps12</i> - <i>clpP</i> (IGS)             | LSC    | A                     | C                         |
| 37  | <i>clpP</i> - <i>psbB</i> (IGS)              | LSC    | G                     | A                         |
| 38  | <i>petB</i> - <i>petB</i> (intron)           | LSC    | C                     | G                         |

|    |                                      |     |   |   |
|----|--------------------------------------|-----|---|---|
| 39 | <i>petD</i> - <i>petD</i> (intron)   | LSC | T | C |
| 40 | <i>rpl16</i> - <i>rpl16</i> (intron) | LSC | T | G |
| 41 | <i>rpl16</i> - <i>rpl16</i> (intron) | LSC | G | T |
| 42 | <i>rpl16</i> - <i>rps3</i> (IGS)     | LSC | G | A |
| 43 | <i>ndhF</i> (exon)                   | SSC | T | C |
| 44 | <i>ndhF</i> - <i>trnL-UAG</i> (IGS)  | SSC | T | A |
| 45 | <i>ndhF</i> - <i>trnL-UAG</i> (IGS)  | SSC | T | C |
| 46 | <i>ndhF</i> - <i>trnL-UAG</i> (IGS)  | SSC | A | C |
| 47 | <i>trnL-UAG</i> (exon)               | SSC | T | G |
| 48 | <i>ndhD</i> (exon)                   | SSC | T | G |
| 49 | <i>psaC</i> (exon)                   | SSC | A | T |
| 50 | <i>ndhG</i> (exon)                   | SSC | T | C |
| 51 | <i>ndhG</i> - <i>ndhI</i> (IGS)      | SSC | A | G |
| 52 | <i>ndhI</i> (exon)                   | SSC | G | A |
| 53 | <i>ndhI</i> - <i>ndhA</i> (IGS)      | SSC | G | A |
| 54 | <i>ycf1</i> (exon)                   | SSC | A | C |
| 55 | <i>ycf1</i> (exon)                   | SSC | A | C |
| 56 | <i>ycf1</i> (exon)                   | SSC | T | C |
| 57 | <i>ycf1</i> (exon)                   | SSC | A | G |
| 58 | <i>ycf1</i> (exon)                   | SSC | G | T |
| 59 | <i>ycf1</i> (exon)                   | SSC | C | A |
| 60 | <i>ycf1</i> (exon)                   | SSC | T | C |
| 61 | <i>ycf1</i> (exon)                   | SSC | A | T |
| 62 | <i>ycf1</i> (exon)                   | SSC | A | C |

---
